# Supplementary material for: MCOLN1 Promotes Proliferation and Predicts Poor Survival of Patients with Pancreatic Ductal Adenocarcinoma
Source: Hindawi journal article supplement (doi:10.1155/2019/9436047), 2019-08-05
Supplement: f1 [file 9436047.f1.pdf]

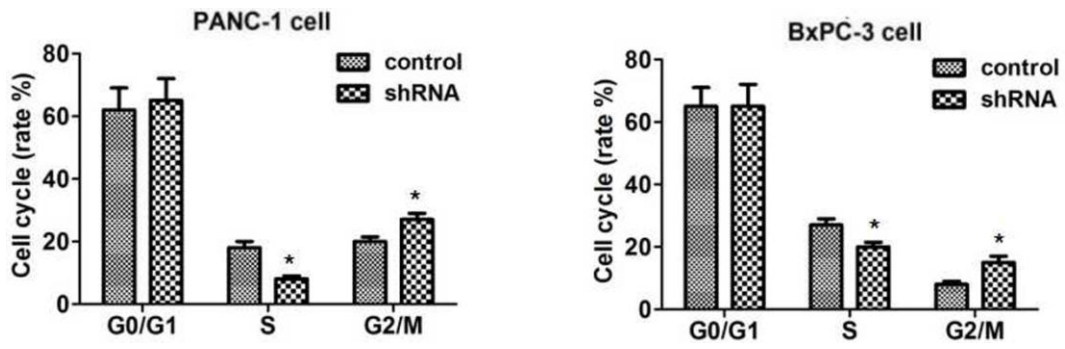

**Figure S1: Knocking down of MCOLN1 induces cell cycle arrest as G2/M phase.**

Flow cytometry was used to analyze the cell cycle of tumor cells. When knocking down of NEDD8, cells in S phase were decreased and cells in G2/M phase were increased dramatically.

\*( $P < 0.05$ ).
